# Supplementary material for: Polymerized β-Cyclodextrin-Based Injectable Hydrogel for Sustained Release of 5-Fluorouracil/Methotrexate Mixture in Breast Cancer Management: In Vitro and In Vivo Analytical Validations
Source: MDPI journal article supplement (doi:10.3390/pharmaceutics14040817), 2022-04-08
Supplement: s1 [file s1]

**Polymerized  $\beta$ -cyclodextrin-based injectable hydrogel for sustained release of 5-fluorouracil/methotrexate mixture in breast cancer management. *In vitro* and *In vivo* Analytical Validations**

# 1. SI\_1\_Figure S1 (A and B)

A)

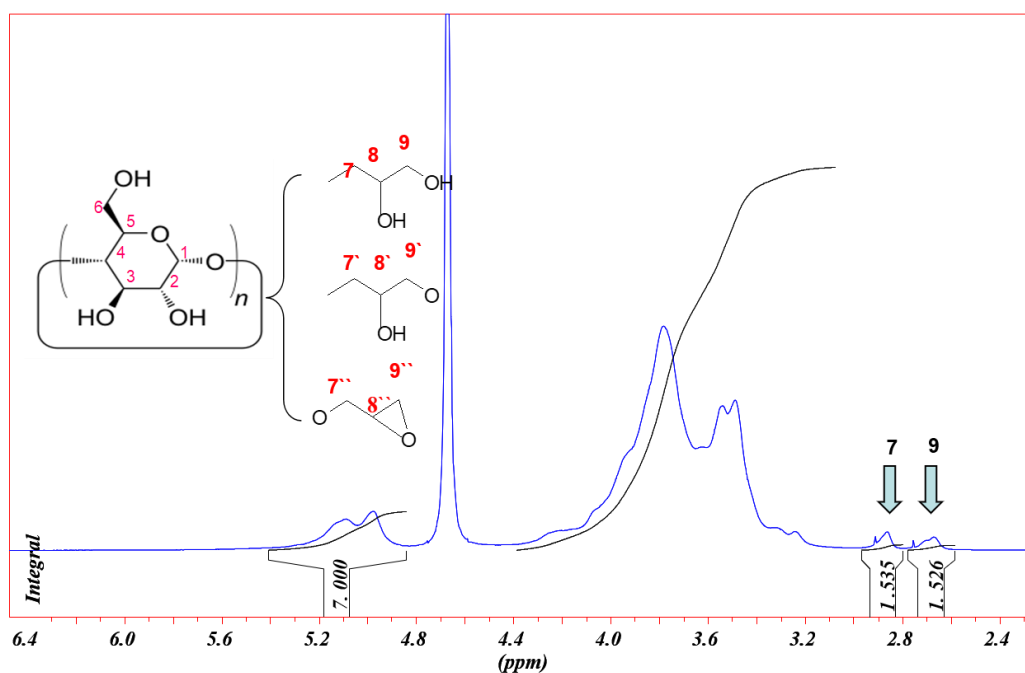

B)

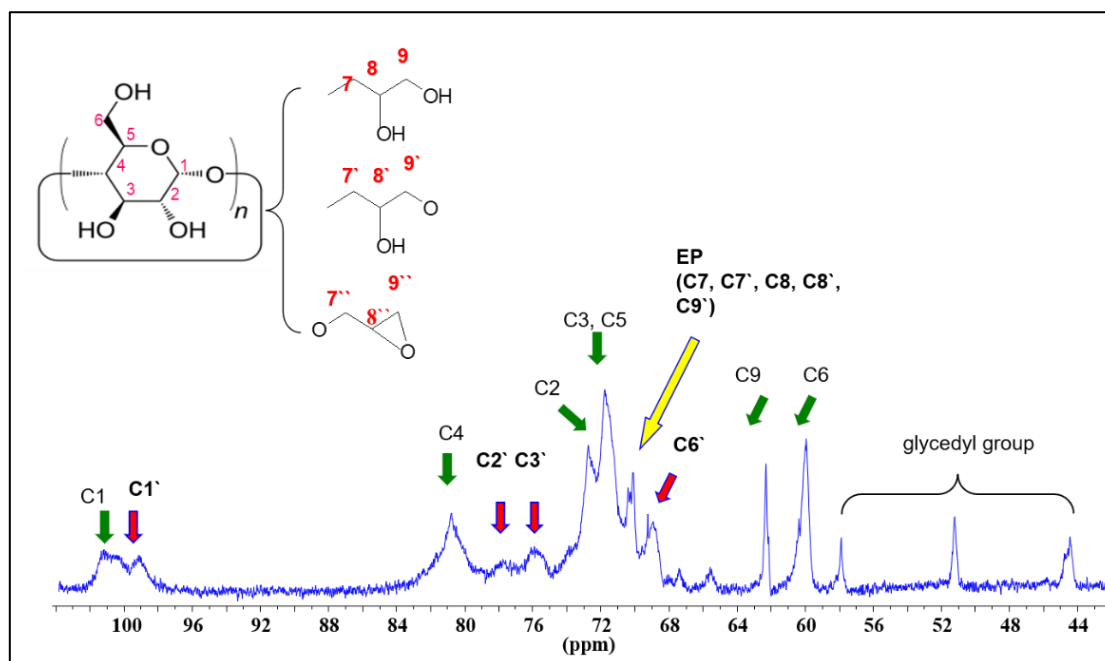

**Figure S1.**  $^1\text{H}$  NMR (600 MHz,  $\text{D}_2\text{O}$ ) spectrum of p $\beta$ -CD, (A).  $^{13}\text{C}$  NMR (600 MHz,  $\text{D}_2\text{O}$ ) spectrum of p $\beta$ -CD, (B).

## 2. SI. 2\_Figure S2

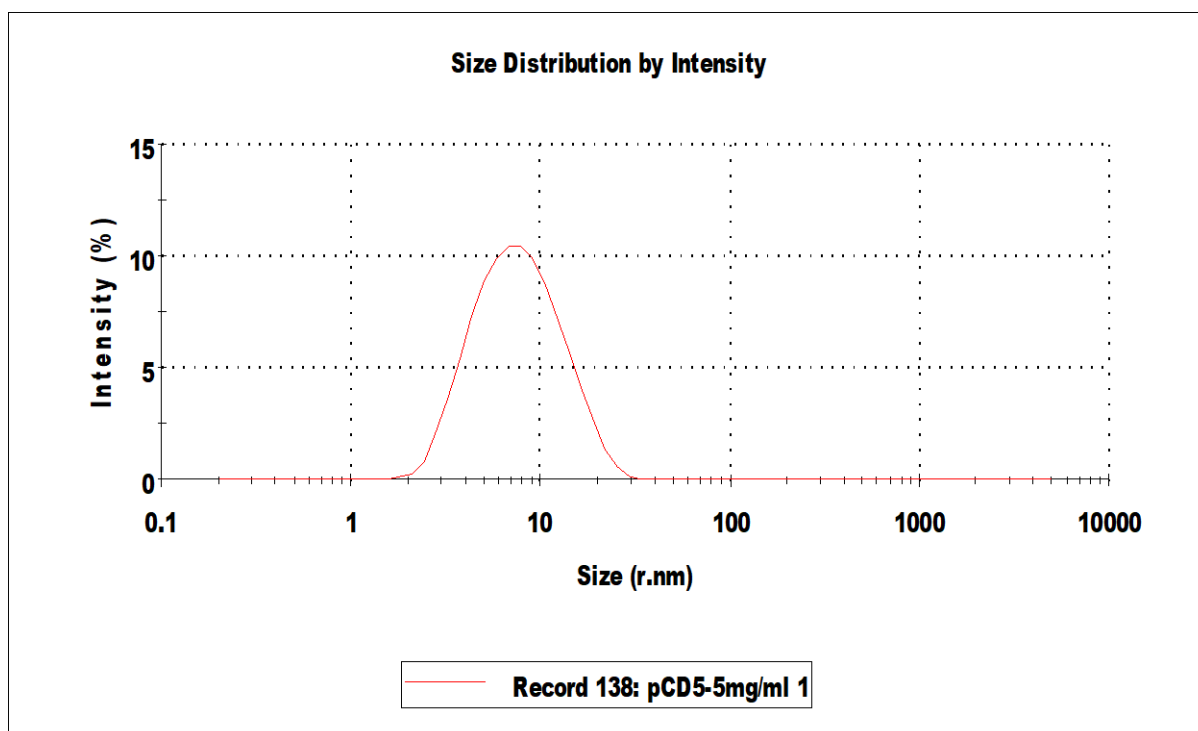

**Figure S2.** DLS spectrum of linear water soluble p $\beta$ -CD polymer synthesized from the interaction between 10 g (8.8 mmole)  $\beta$ -CD and 5g (5.4 mole % or 54 mmole) epichlorohydrin in alkaline medium in the presence of toluene to produce linear polymer.

### Condition of experiment:

Standard: poly(styrene) of RI 1.59, Dispersant: water, Temp: 25, Attenuator: 9

### Reading:

Size average (r.nm): 6.59 hydrodynamic diameter (d.nm): **8.22** % intensity : 100

PI: 0,2

**Mn (g/mol):** on the light of hydrodynamic diameter and regarding the published data, the molecular weight of this polymer is 106 kD.

### 3. SI. 3.\_Figure S3

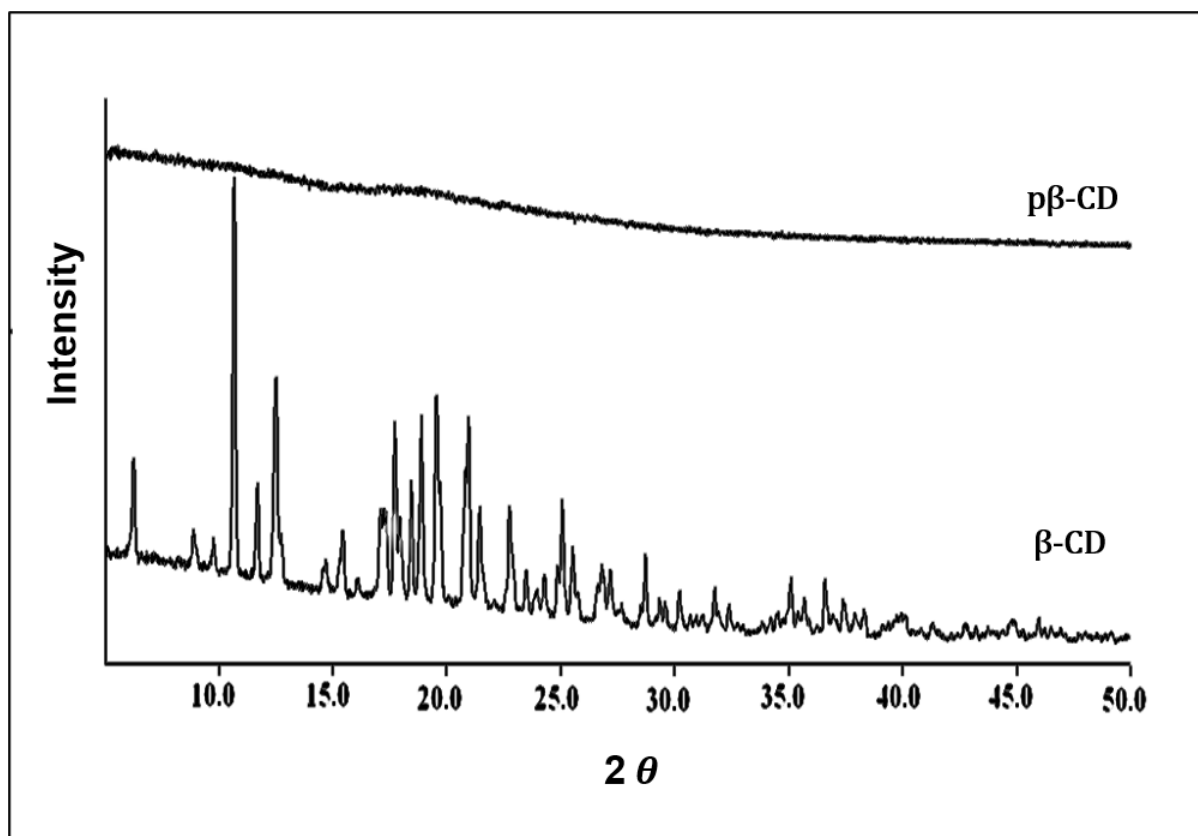

**Figure S3.** X-ray diffraction patterns of  $\beta$ -CD and  $p\beta$ -CD, showing the complete disappearance of crystalline intensity peaks of native cyclodextrin upon polymerization. The x-ray confirmed the conversion of crystalline B-CD from crystalline form to amorphous one.

4. SI. 4\_Figure S4 (A and B)

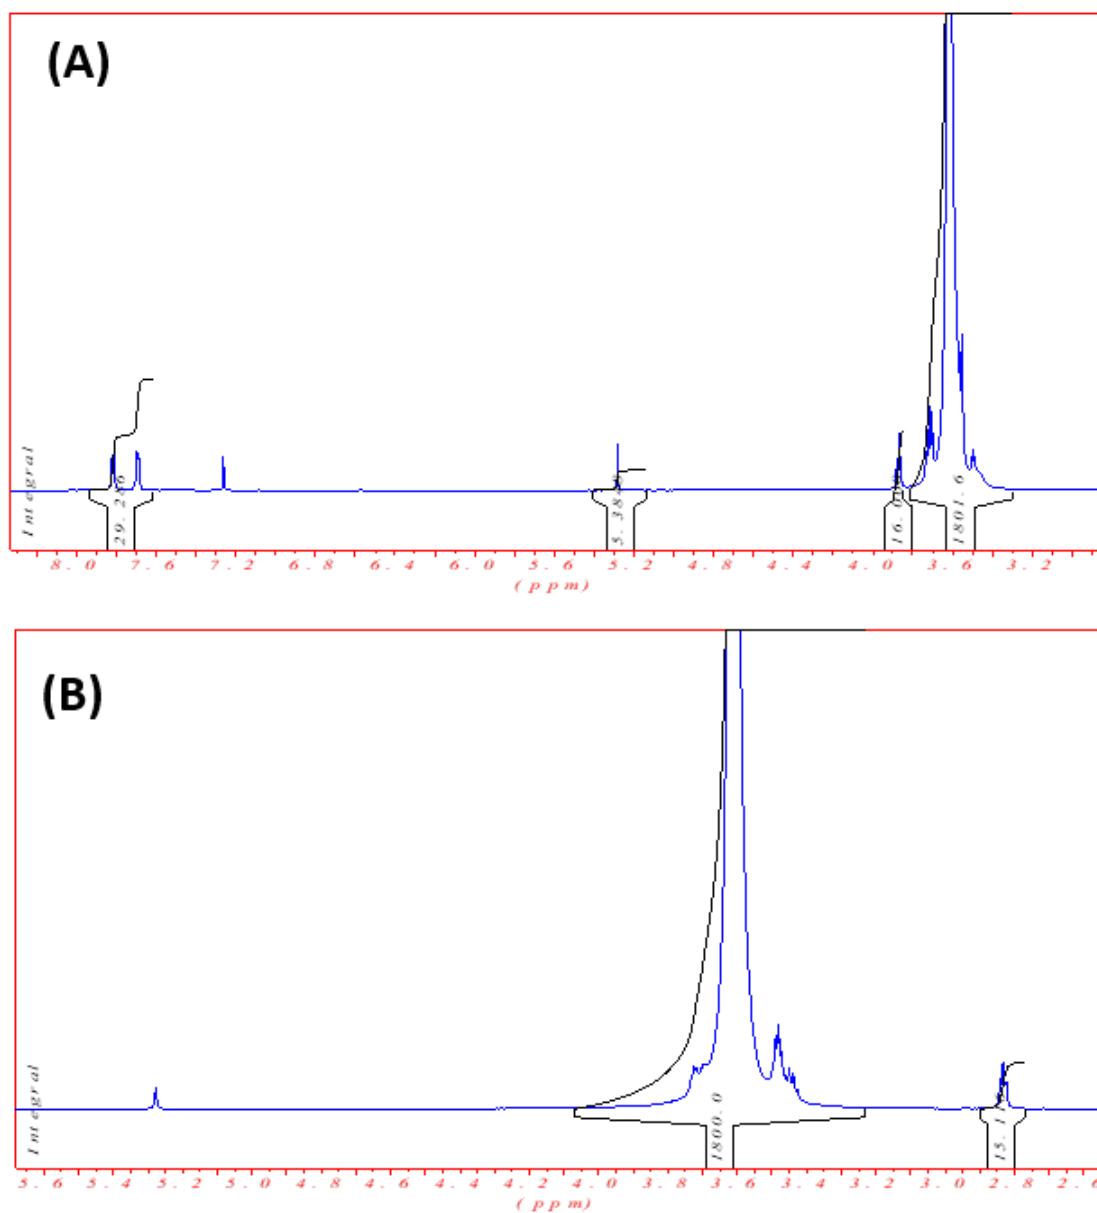

**Figure S4.**  $^1\text{H}$  NMR 600 MHz, 8armPEG20k-Phthalimide (A) and 8armPED20k-Amine (B).

5. SI\_5\_Figure S5 (A and B)

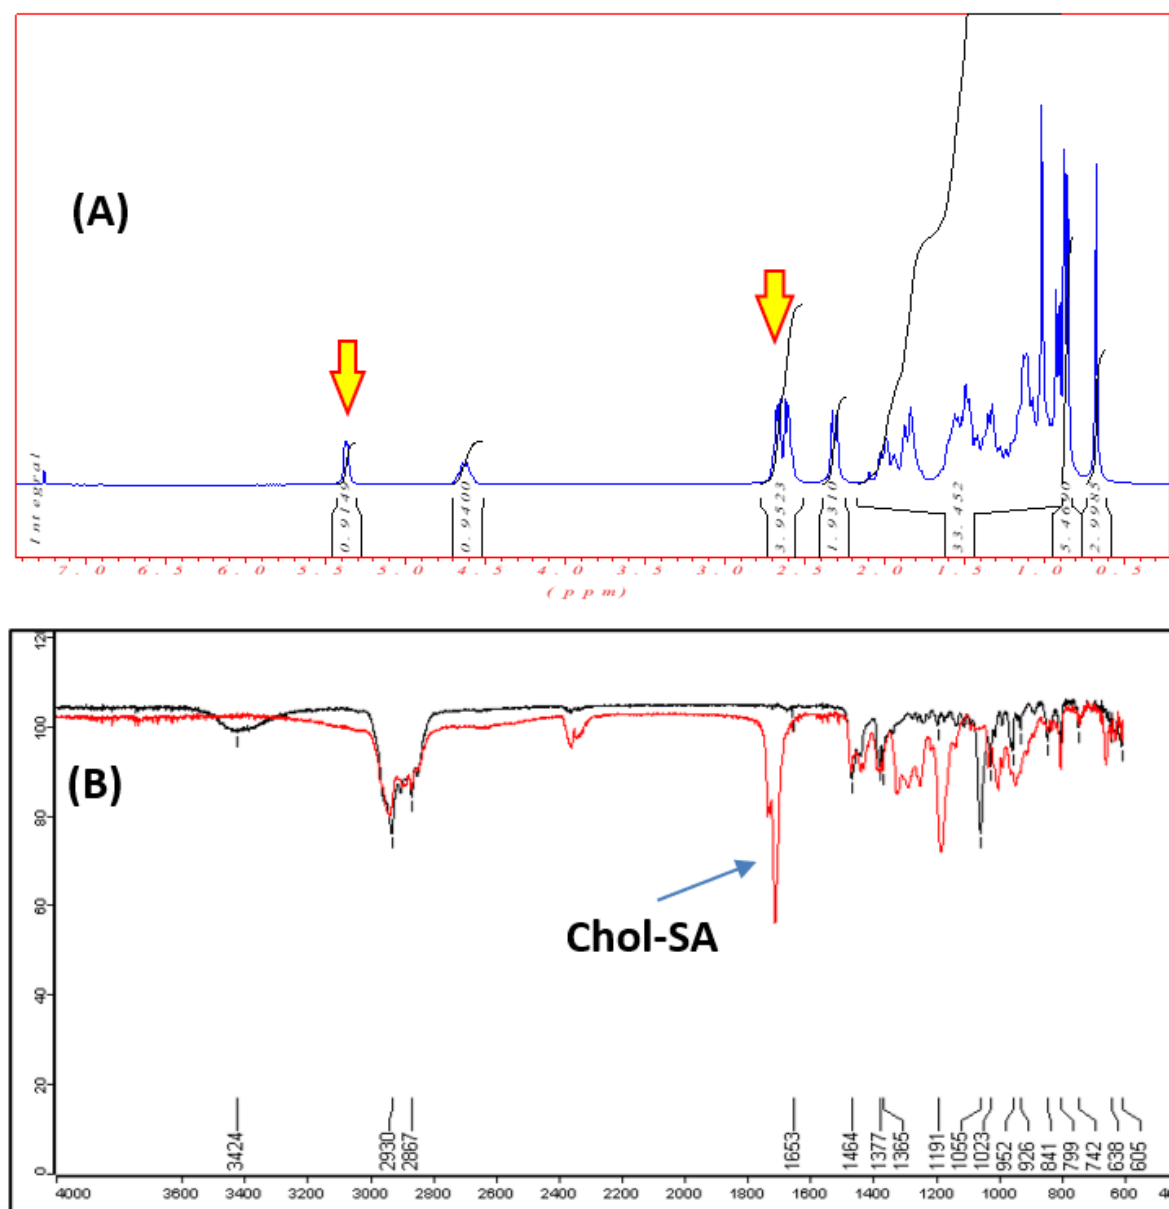

**Figure S5.**  $^1\text{H}$  NMR (CDCl<sub>3</sub>, 300 MHz) (A); IR spectroscopy (B) analysis of cholesterol-propionic acid, compared with cholesterol.

6. SI. 6.\_Figure S6 and Table S1

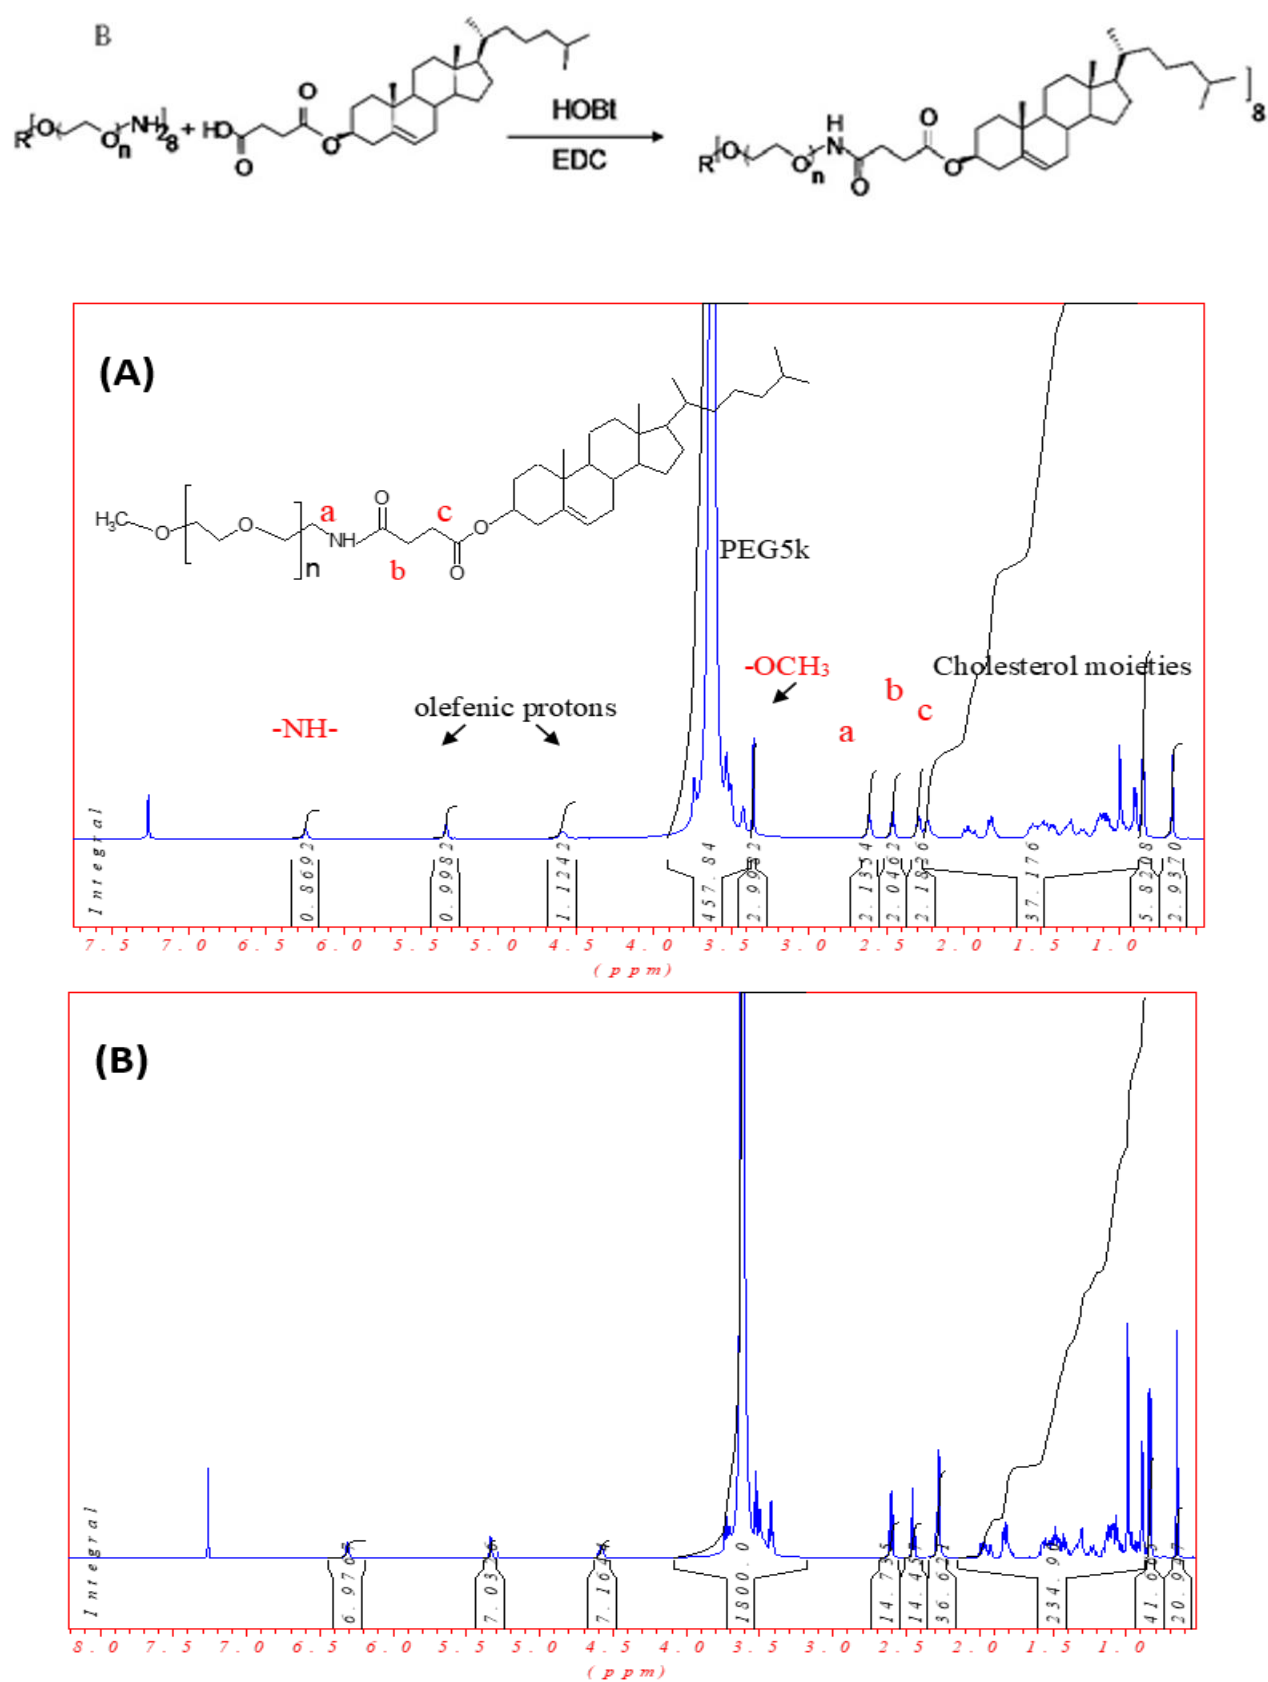

**Figure S6.**  $^1\text{H}$  NMR spectra, 600 MHz of mPEG5k-Chol (A) and 8armPEG20k-Chol (B) in  $\text{CDCl}_3$ .

**Table S1:** Quantification of the NMR signals of the modified PEG-(chol)<sub>n</sub> polymers.

| Polymer, ppm                       |            | 2.3-2.5<br>ppm | 2.65<br>pmm | 3.35<br>pmm | 3.4 - 4.9<br>Pmm<br>Reference<br>peaks | 4.6<br>pmm | 5.4<br>pmm | 6.3<br>pmm | DS  | Mwt  |
|------------------------------------|------------|----------------|-------------|-------------|----------------------------------------|------------|------------|------------|-----|------|
| mPEG5k-Chol                        | Calculated | 4              | 2           | 3           | 458                                    | 1          | 1          | 1          | 100 | 100  |
| mPEG5k-Chol                        | Collected  | 4.1            | 2.1         | 2.99        | 457.8                                  | 1.1        | 0.99       | 0.86       |     | 99   |
| 8armPEG20k-<br>(Chol) <sub>8</sub> | Calculated | 32             | 16          |             | 1800                                   | 8          | 8          | 8          | 100 | 100  |
| 8armPEG20k-<br>(Chol) <sub>7</sub> | Collected  | 28             | 14          |             | 1800                                   | 7          | 7          | 7          | 7   | 87.5 |



## 7. SI. 7\_Figure S7 (A and B)

A)

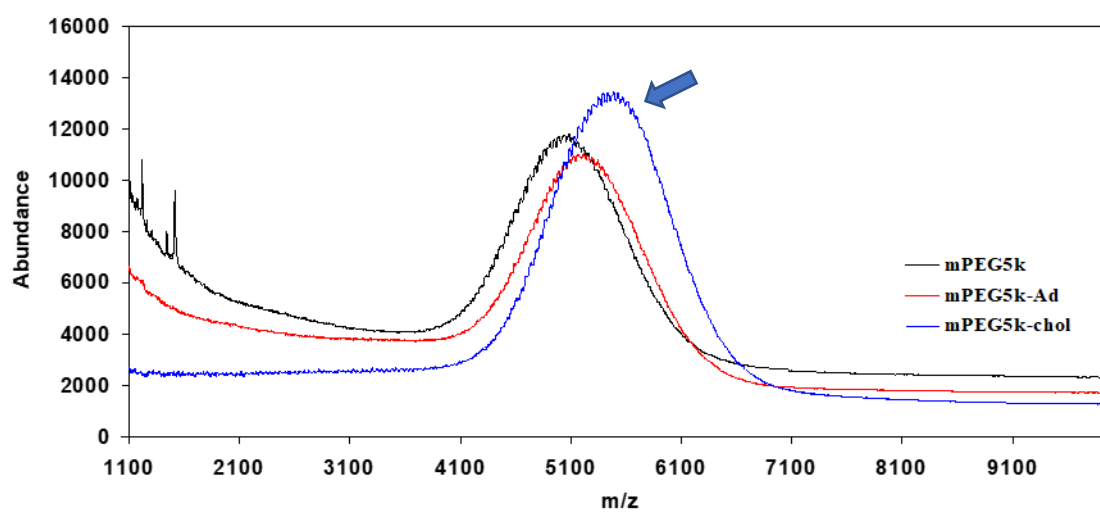

B)

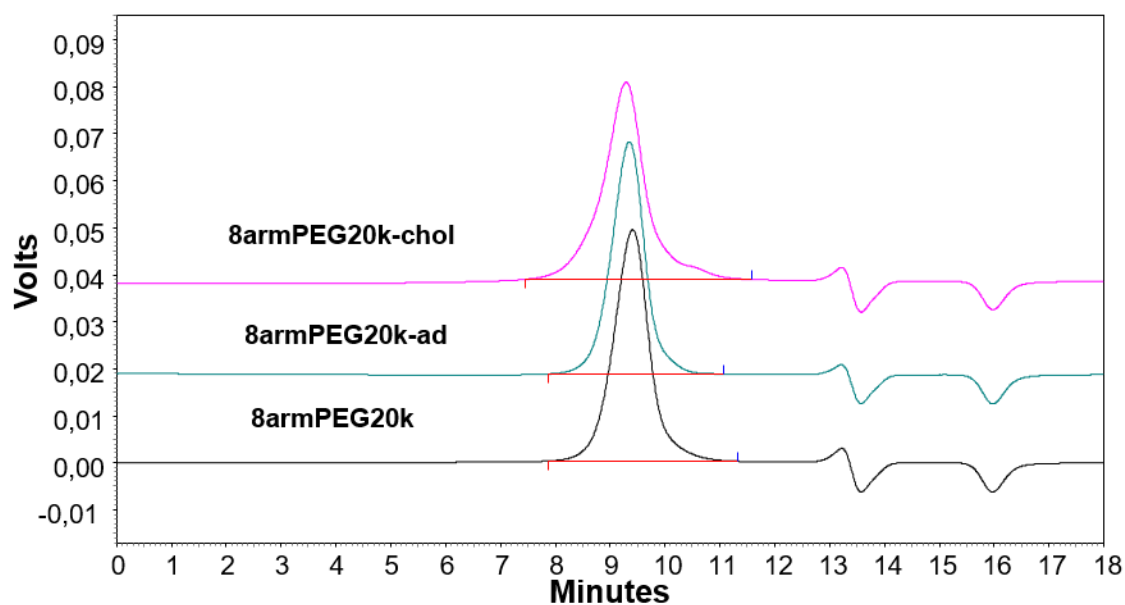

**Figure S7.** (A) MALDI-ToF mass spectra of unmodified mPEG5k, mPEG5k-Ad and mPEG5k-Chol in THF. The matrix is IAA-THF layer by layer technique. (B) GPC profiles of chromatograms of unmodified and hydrophobically modified 8armPEG20k.

**8. SL. 8\_Figure S8**

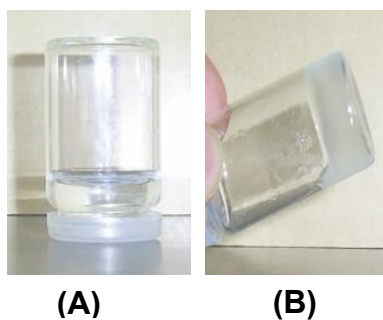

**Figure S8.** Fotos of the modified hydrogel, composed of 10% w/v 8armPEG20k-cholesterol- $\beta$ -CD (B) in comparison with viscous liquid composed 10% w/v 8armPEG20k-OH/ $\beta$ -CD (A).

## 9. SL 9\_Figure S9

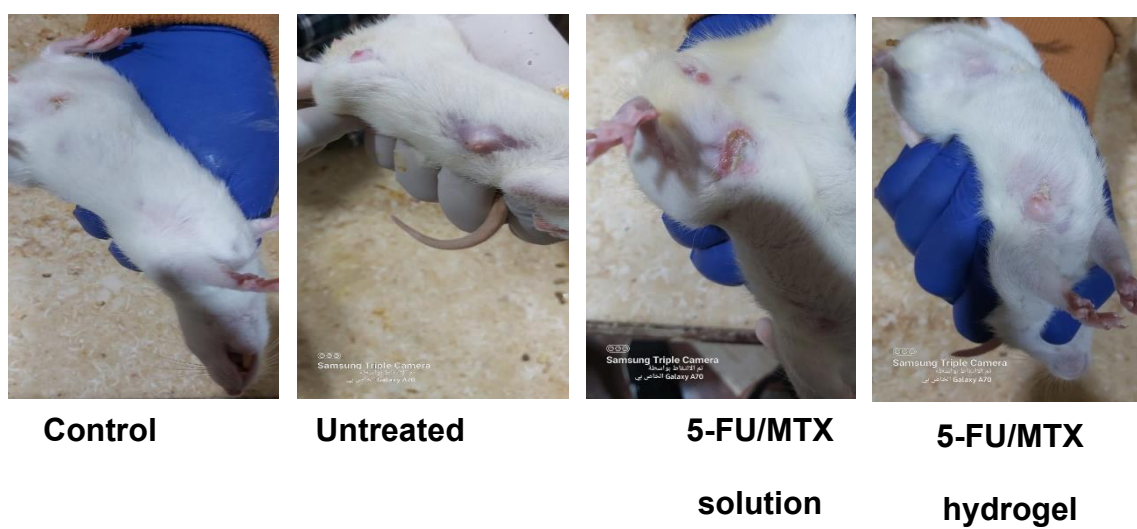

**Figure S9.** Pictures of the rats bearing breast cancer before and after treatment by 5-FU/MTX either a saline solution or loaded hydrogel.
